# Supplementary material for: Deep eutectic solvents as a new kind of dispersive solvent for dispersive liquid–liquid microextraction
Source: Royal Society of Chemistry journal article supplement (doi:10.1039/c8ra07300g), 2018-01-01

Figure captions to the paper entitled

**Deep eutectic solvents as a new kind of dispersive solvents for dispersive liquid-liquid  
microextraction**

authored by Andrey Shishov, Natalia Volodina, Daria Nechaeva, Svetlana Gagarinova, Andrey Bulatov

ESM Fig. 1. Number of publications on dispersive liquid-liquid microextraction (DLLME) for the past 11 years

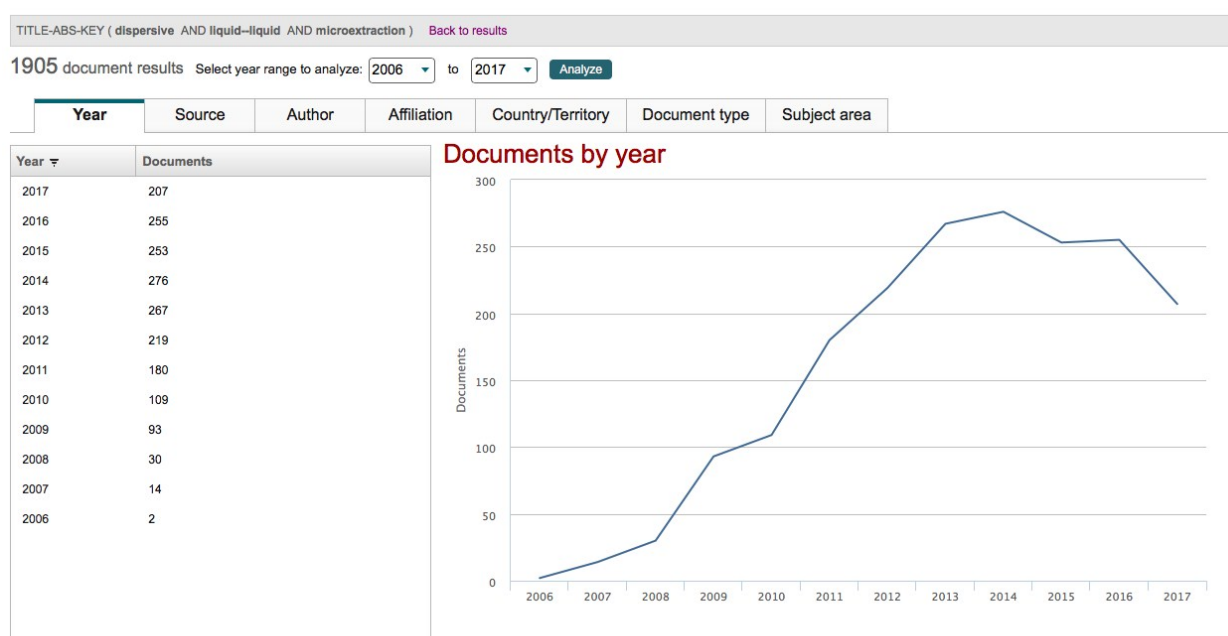

Supplement: c8ra07300g1.pdf [file c8ra07300g1.pdf]
